# Supplementary figures and images for: Lactoferrin ameliorates pathological cardiac hypertrophy related to mitochondrial quality control in aged mice
Source: Royal Society of Chemistry journal article supplement (doi:10.1039/d0fo03346d), 2021-01-01

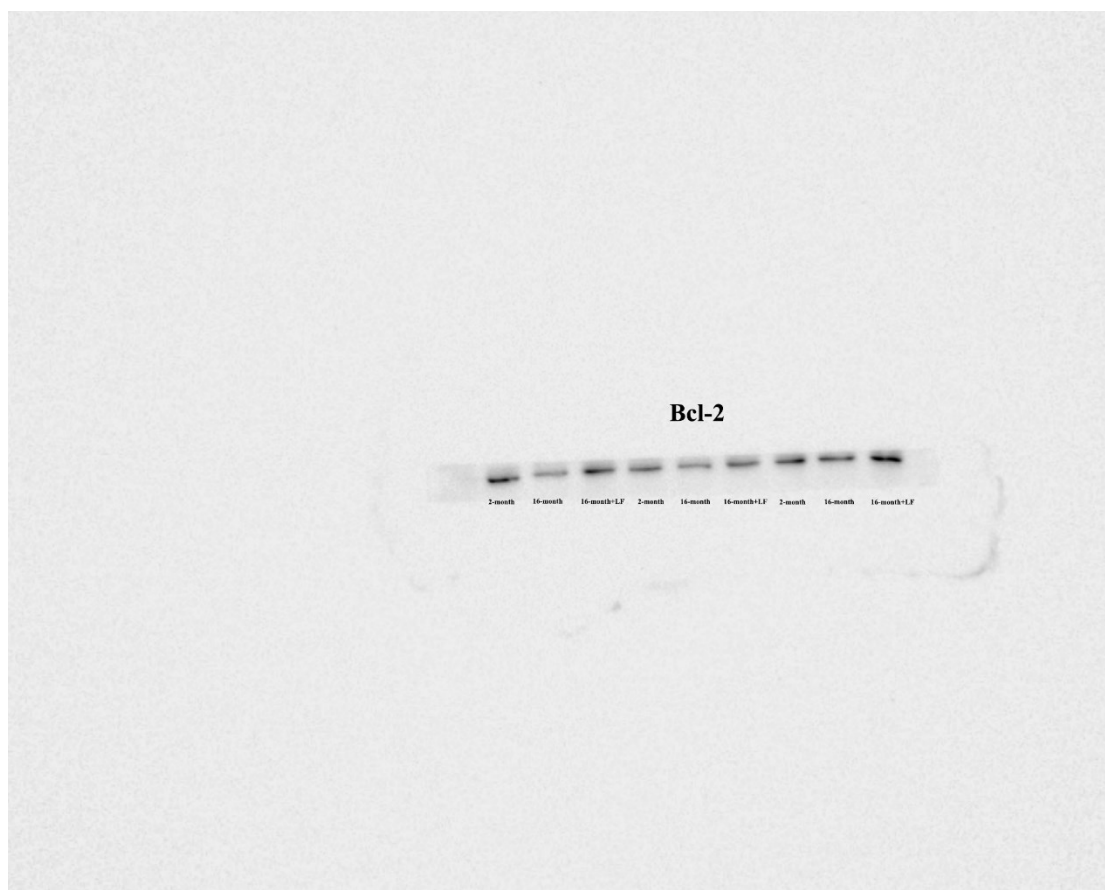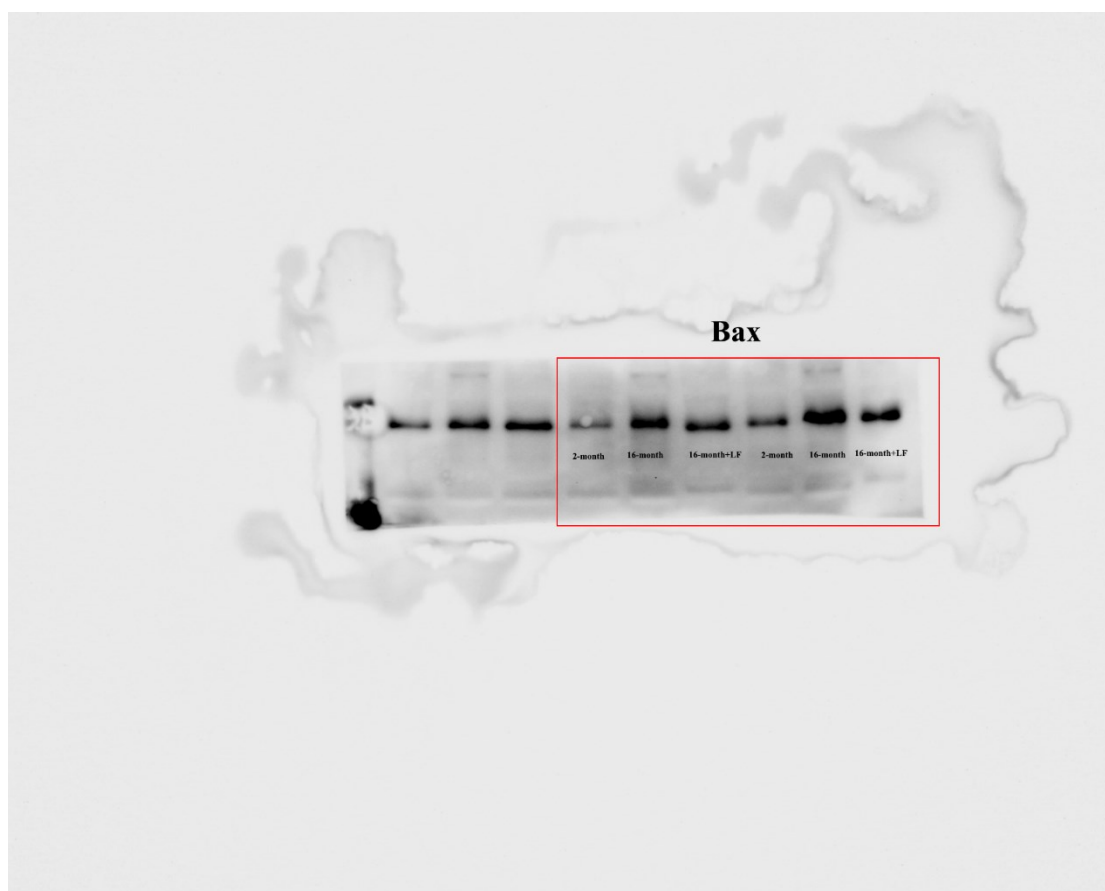

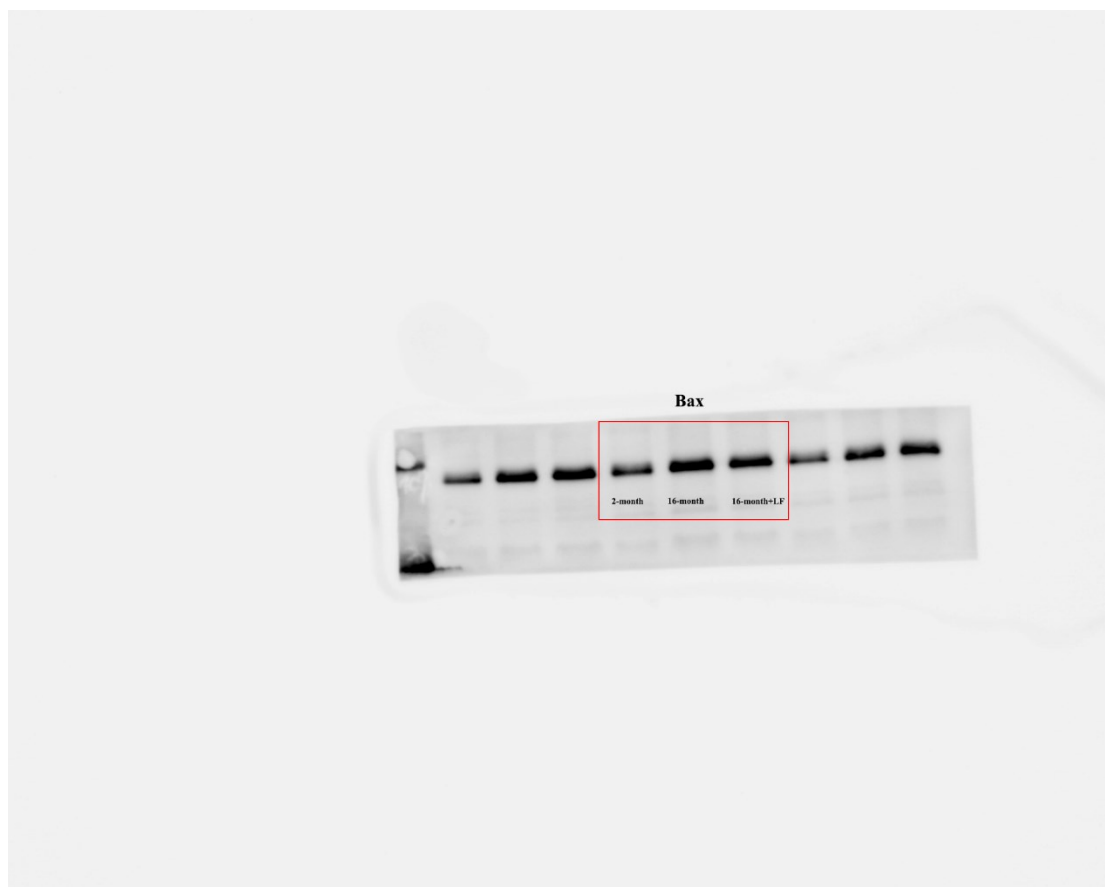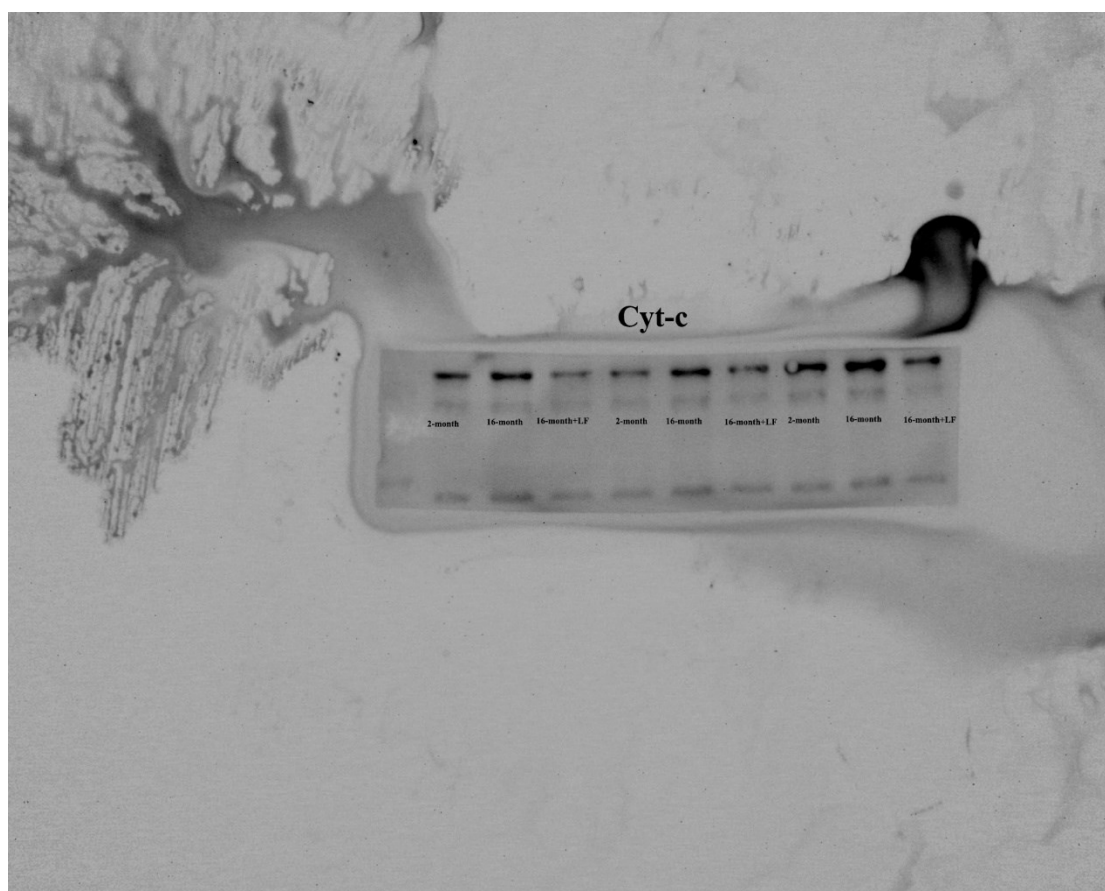

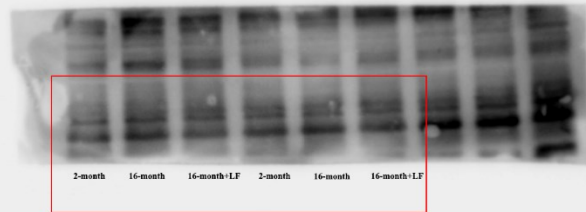

**Cleaved caspase9**

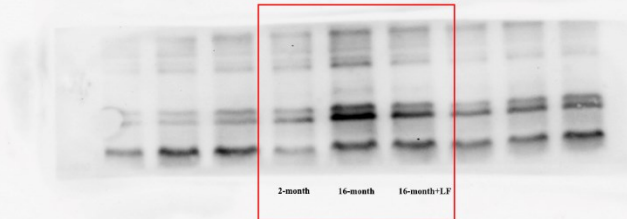

**Cleaved caspase9**

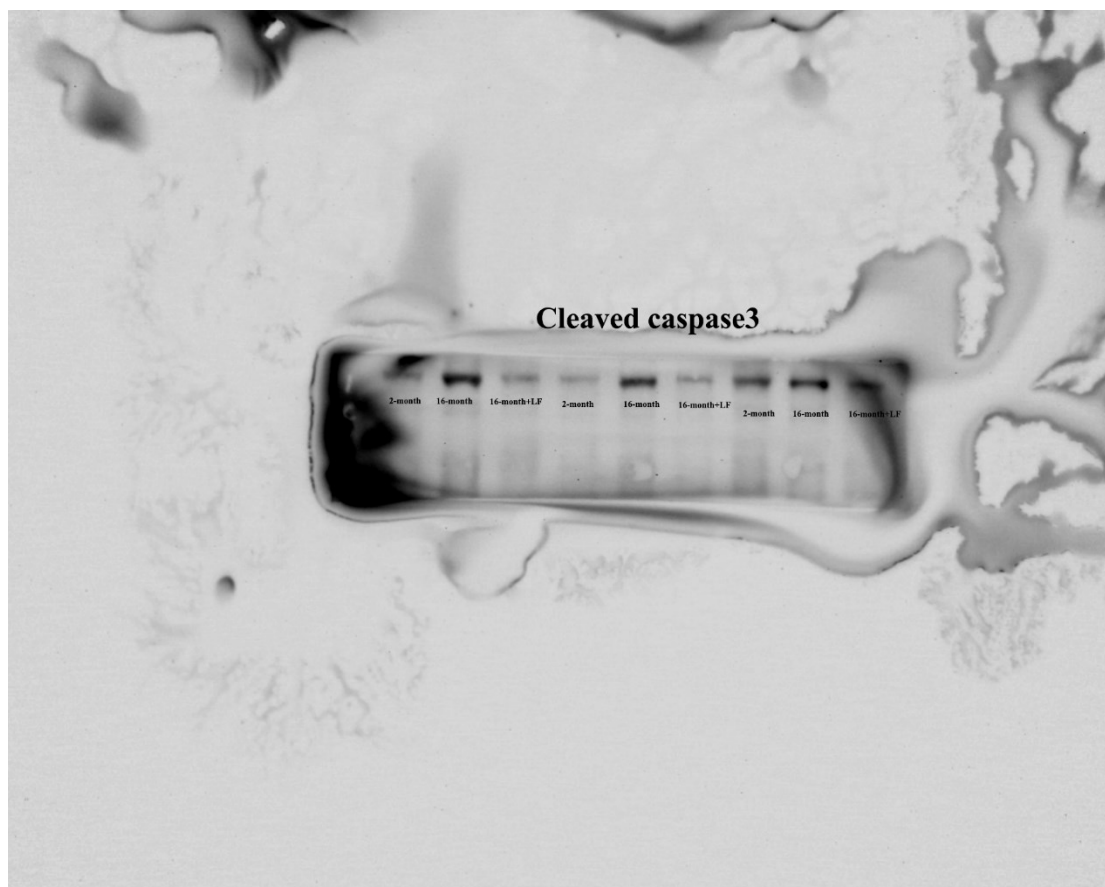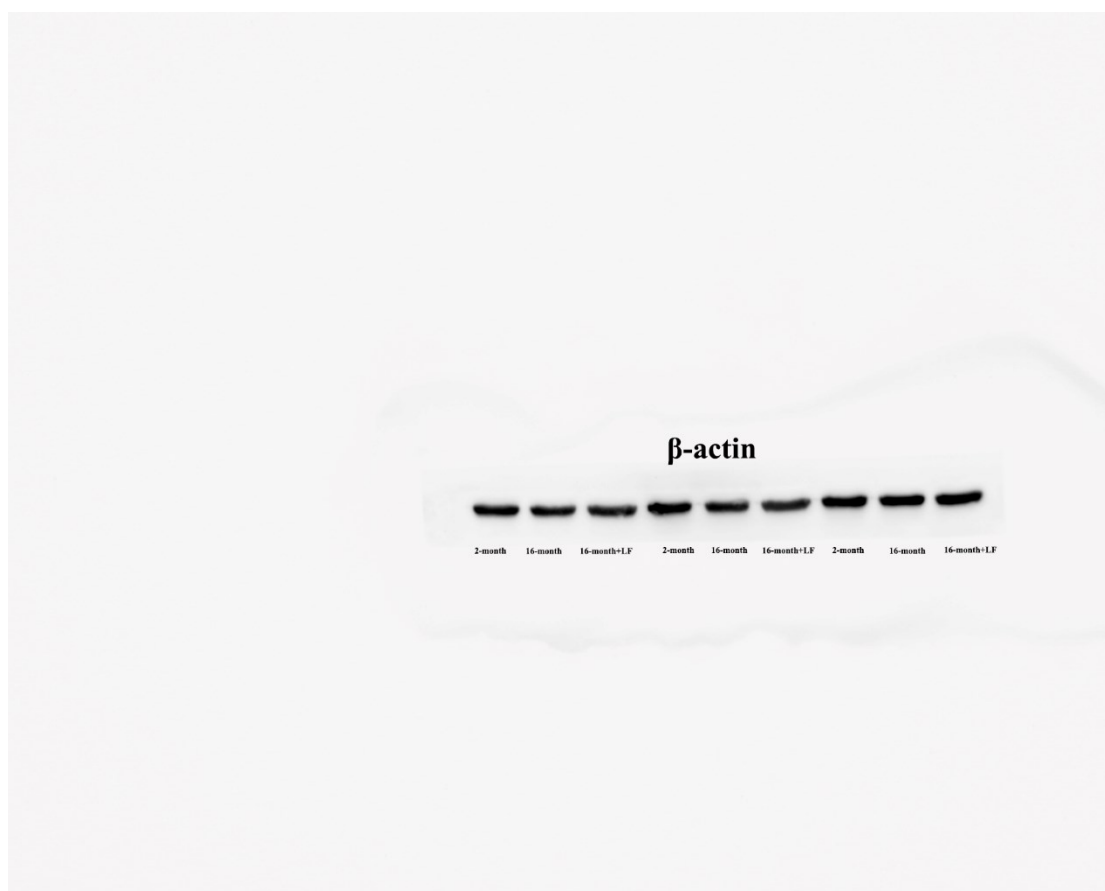

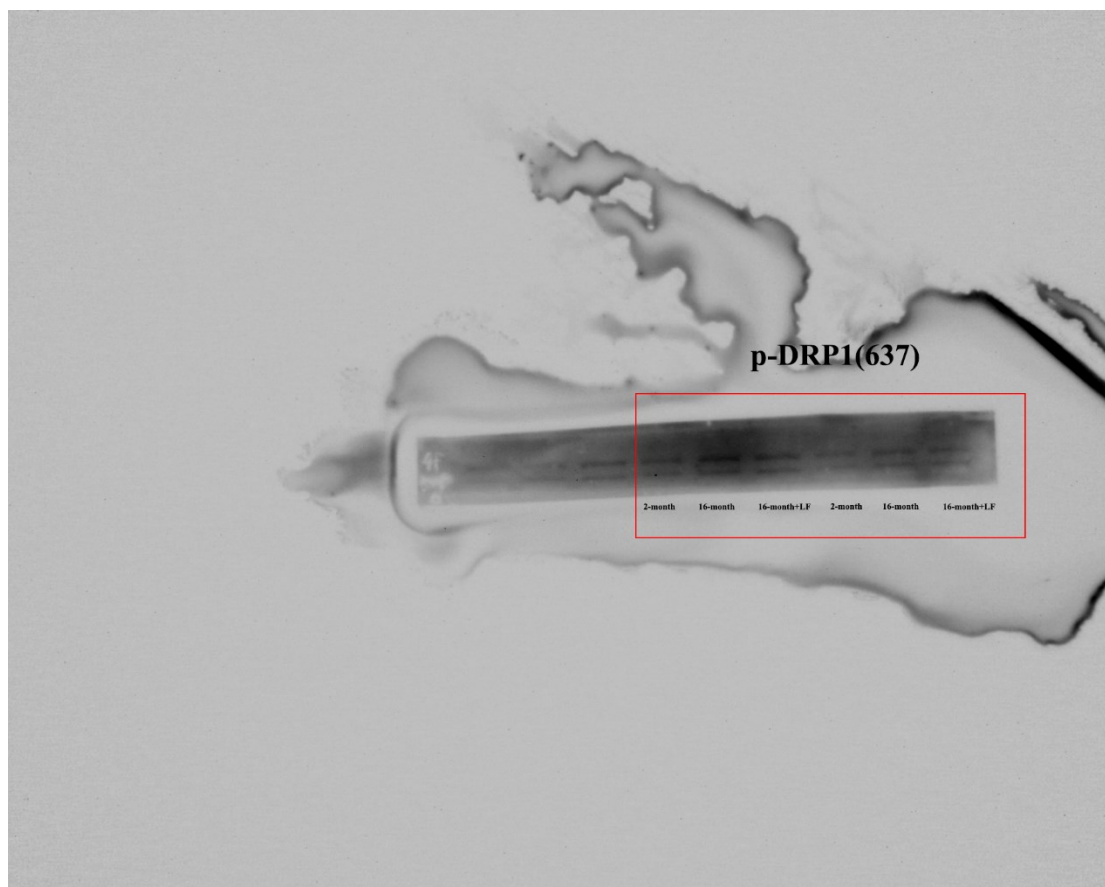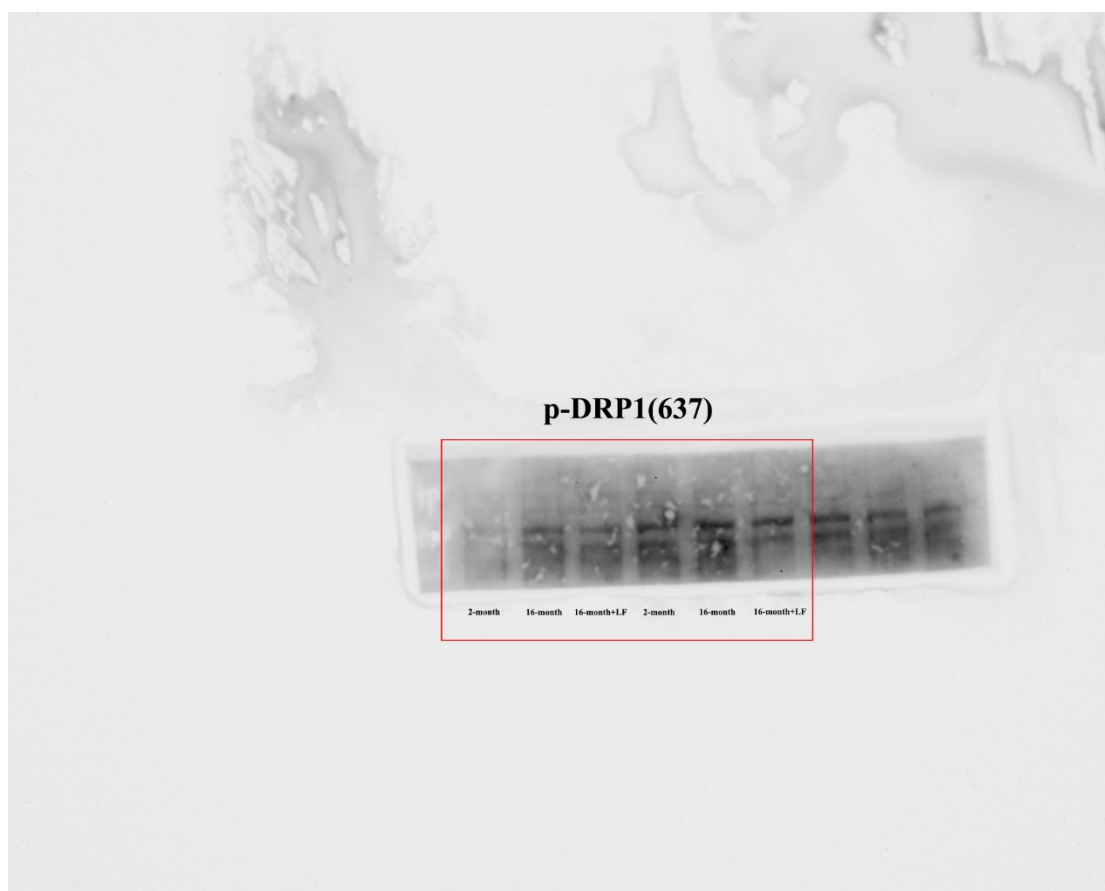



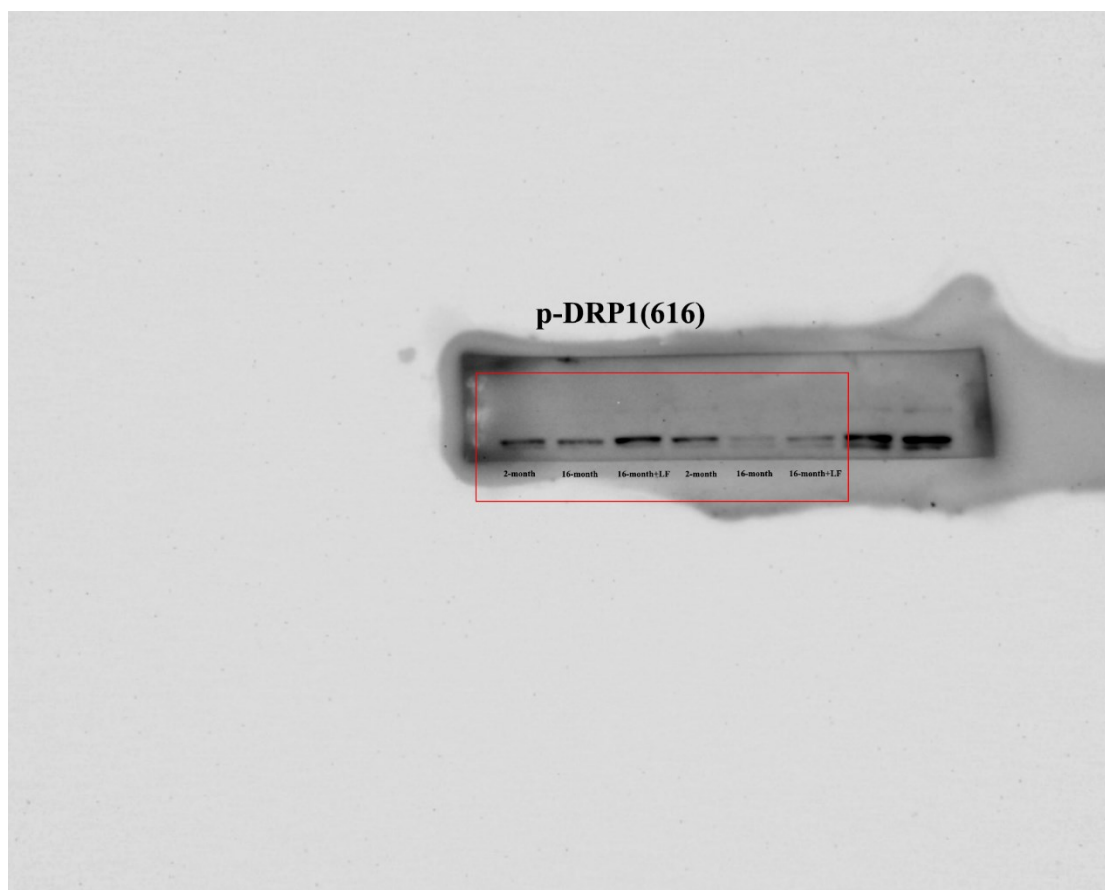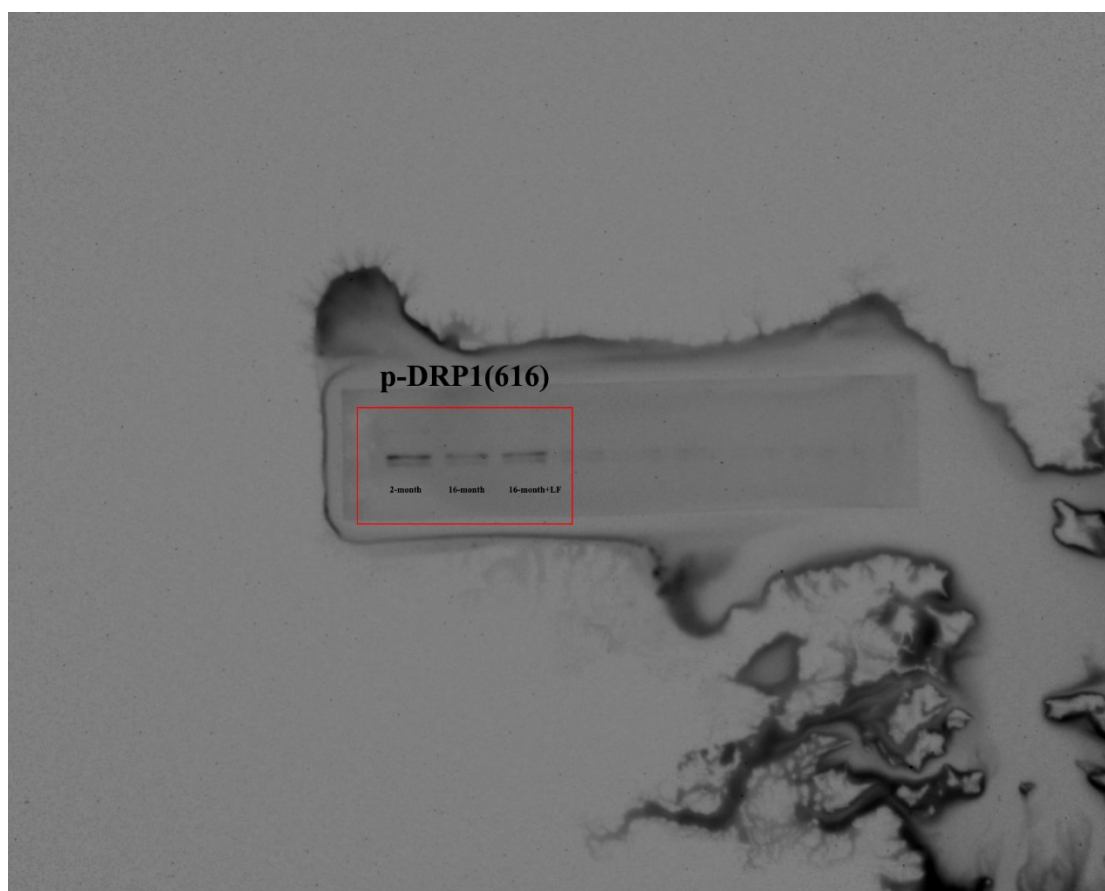

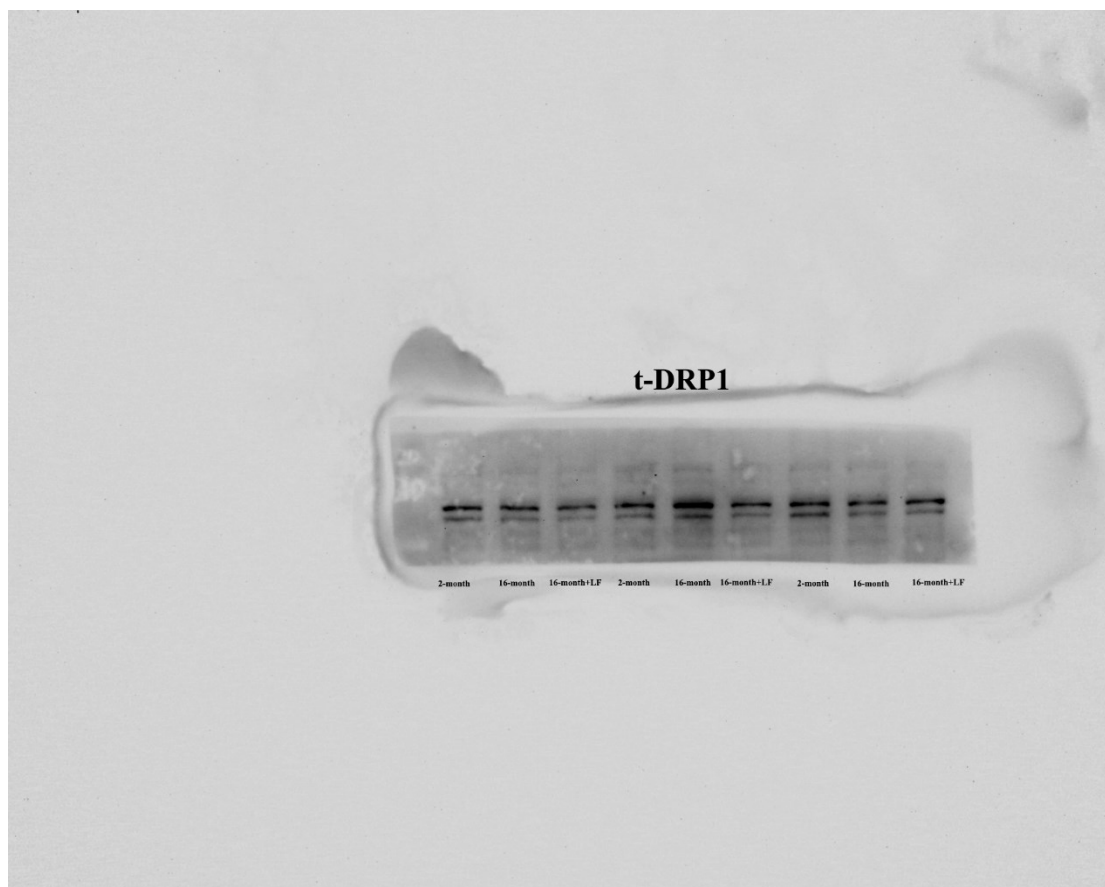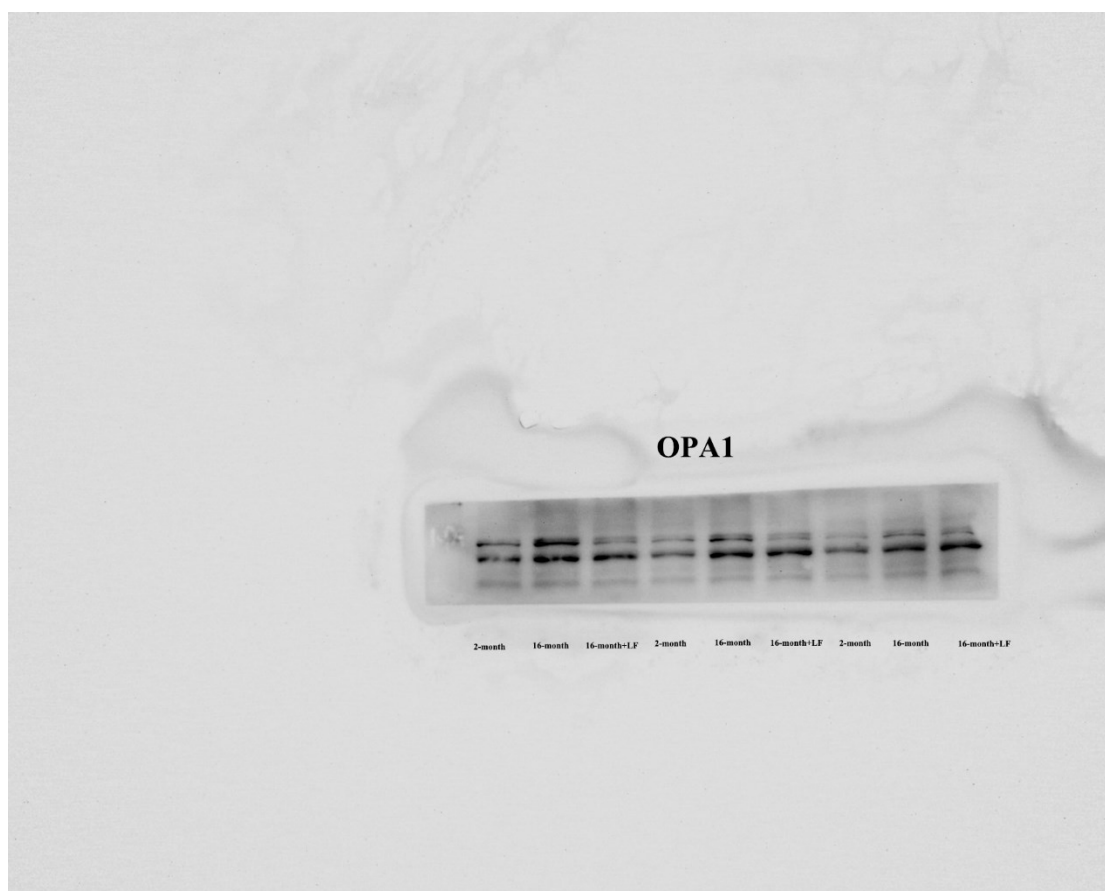

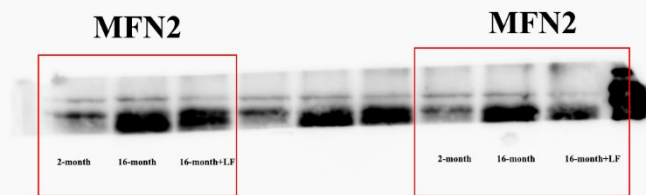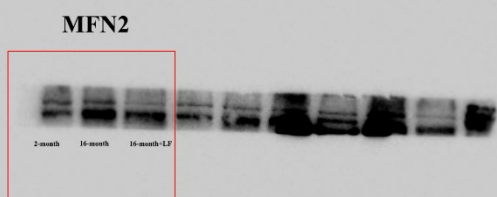



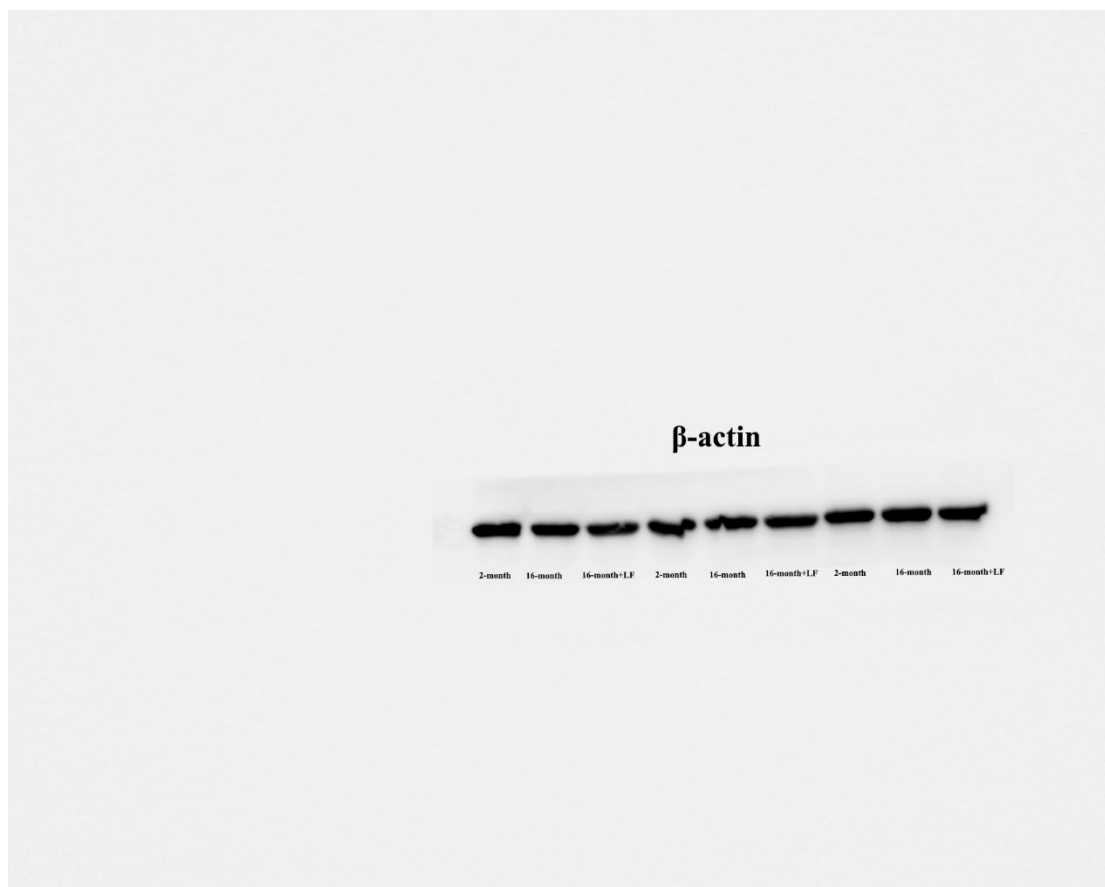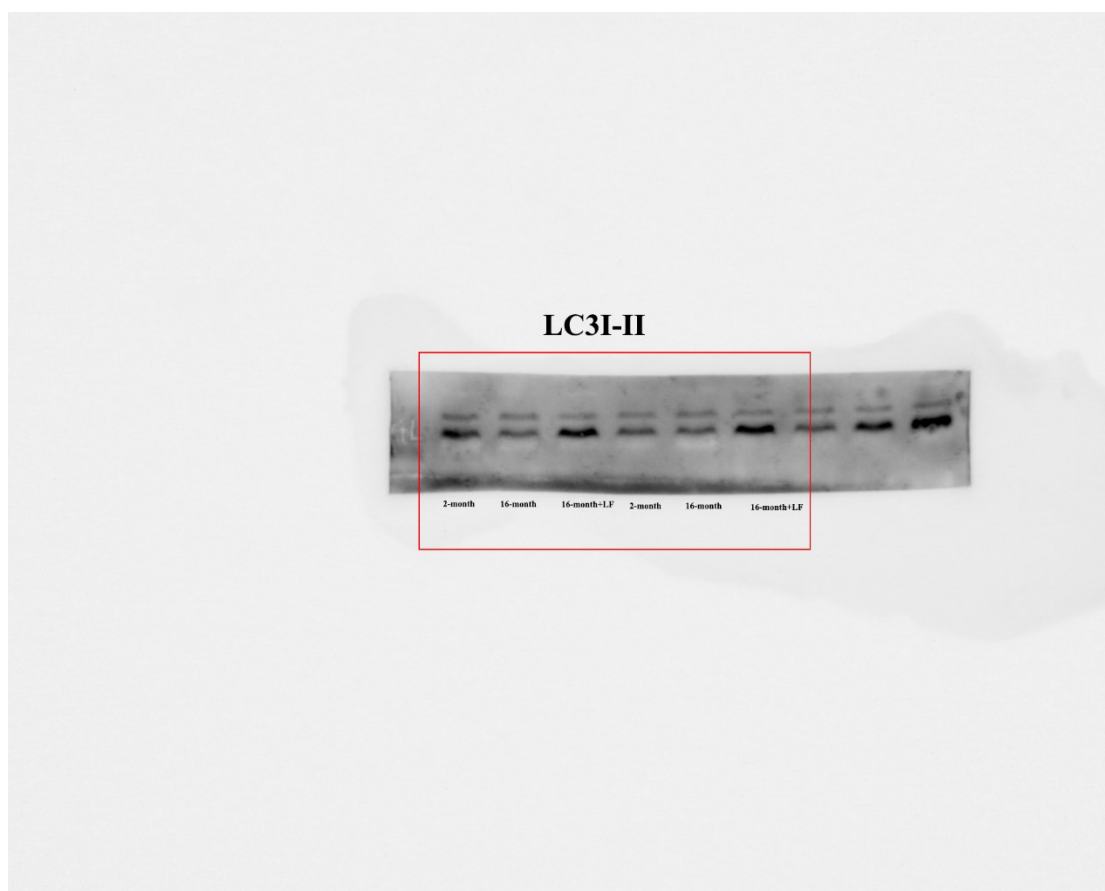

**LC3I-II**

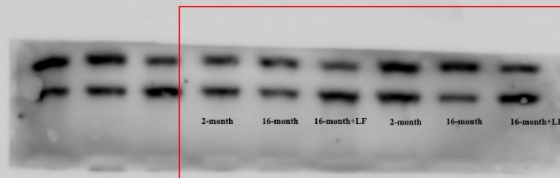

**$\beta$ -actin**

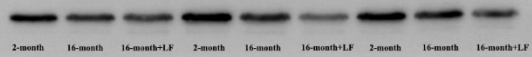

Supplement: d0fo03346d1.pdf [file d0fo03346d1.pdf]
